# Supplementary material for: Isolation of Heartland Virus from Lone Star Ticks, Georgia, USA, 2019
Source: PubMed Central journal article supplement (PMC8962890; doi:10.3201/eid2804.211540), 2022-04

# Isolation of Heartland Virus from Lone Star Ticks, Georgia, USA, 2019

## Appendix

**Appendix Table 1.** Sequencing metrics for 3 genome segments from 3 Heartland virus–positive pools collected in Georgia, USA, 2019

| Sample no. | Total reads | Small coverage, % | Mean small depth | Medium coverage, % | Mean medium depth | Large coverage, % | Mean large depth |
|------------|-------------|-------------------|------------------|--------------------|-------------------|-------------------|------------------|
| HRT23      | 3,908,804   | 98.0              | 21               | 99.3               | 52                | 98.7              | 24               |
| HRT26      | 4,625,523   | 95.7              | 24               | 100.0              | 76                | 99.2              | 50               |
| HRT504     | 5,575,666   | 85.1              | 8                | 99.5               | 40                | 88.8              | 7                |

**Appendix Table 2.** Pairwise nucleotide identity between 3 HRTV virus genomes sequenced in this study, Georgia, 2019, and the only 3 previously published HRTV genomes\*

| Sample    | Location              | Small segment, % nucleotide identity |       |         |          |          | Medium segment, % nucleotide identity |       |         |          |          | Large segment, % nucleotide identity |       |         |          |          |
|-----------|-----------------------|--------------------------------------|-------|---------|----------|----------|---------------------------------------|-------|---------|----------|----------|--------------------------------------|-------|---------|----------|----------|
|           |                       | HRT23                                | HRT26 | HRT 504 | JX00584X | KJ74014X | HRT23                                 | HRT26 | HRT 504 | JX00584X | KJ74014X | HRT23                                | HRT26 | HRT 504 | JX00584X | KJ74014X |
| HRT23     | Site 1                | /                                    |       |         |          |          | /                                     |       |         |          |          | /                                    |       |         |          |          |
| HRT26     | Site 1                | 100.0                                |       |         |          |          | 100.0                                 |       |         |          |          | 99.8                                 |       |         |          |          |
| HRT504    | Site 2                | 97.6†                                | 97.6† |         |          |          | 99.7                                  | 99.8  |         |          |          | 91.6†                                | 91.8† |         |          |          |
| JX00584X  | Missouri 2009, human  | 97.5                                 | 97.4  | 95.1†   |          |          | 95.6                                  | 95.6  | 95.5    |          |          | 97.8                                 | 97.9  | 90.1†   |          |          |
| KJ74014X  | Tennessee 2013, human | 97.6                                 | 97.4  | 95.2†   | 97.4     |          | 98.4                                  | 98.4  | 98.2    | 95.7     |          | 98.0                                 | 98.1  | 90.4†   | 98.0     |          |
| NC_02449X | Missouri 2009, human  | 97.9                                 | 97.8  | 95.6†   | 98.3     | 97.9     | 98.2                                  | 98.2  | 98.1    | 95.5     | 98.4     | 97.9                                 | 98.0  | 90.2†   | 98.1     | 98.0     |

\*HRTV, Heartland virus; / indicates that the percentage identity shown includes sequence ambiguities.

†For sample HRT504, only partial small and large segments were sequenced.

**A**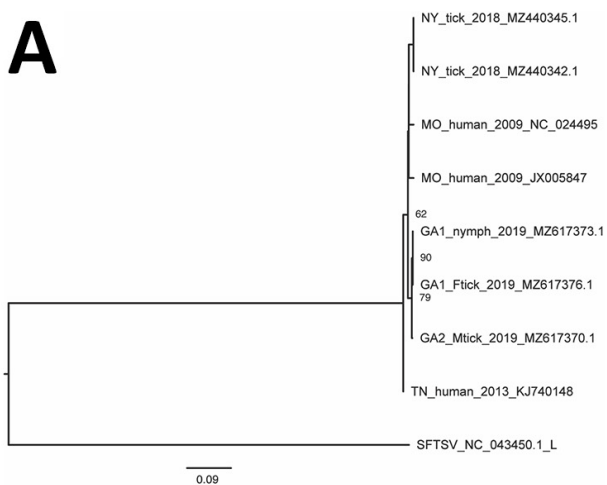**B**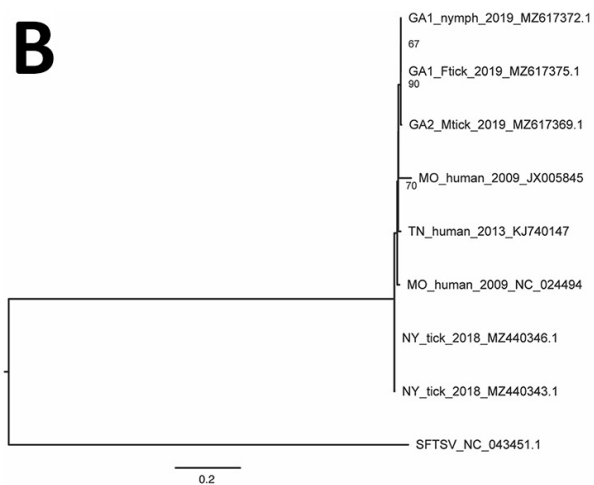**C**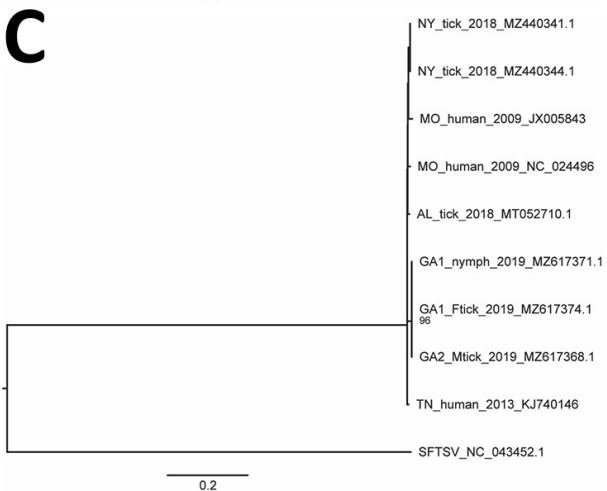**D**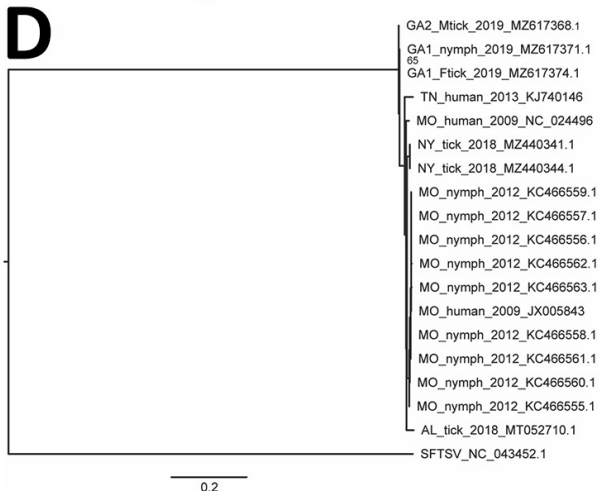

Supplement: 21-1540-Techapp-s1.pdf [file 21-1540-Techapp-s1.pdf]
